# Supplementary material for: LSAP: A Machine Learning Method for Leaf-Senescence-Associated Genes Prediction
Source: MDPI journal article supplement (doi:10.3390/life12071095), 2022-07-21
Supplement: s1 [file s1]

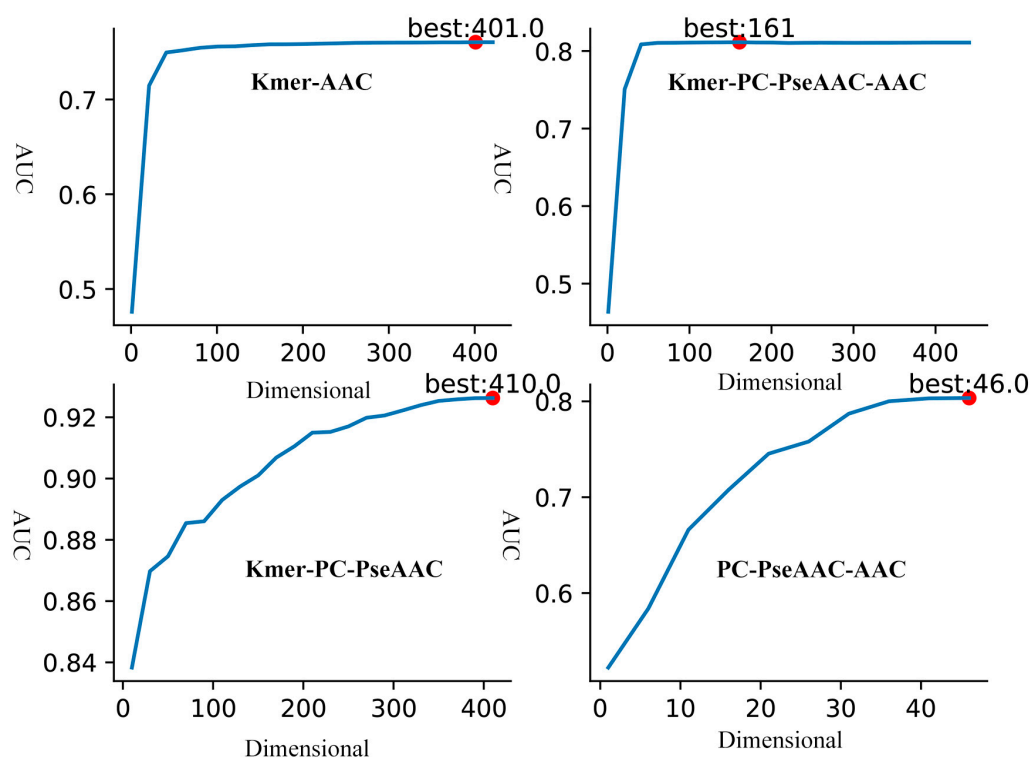

Figure S1: The most discriminative dimensional features number using SVM algorithm.

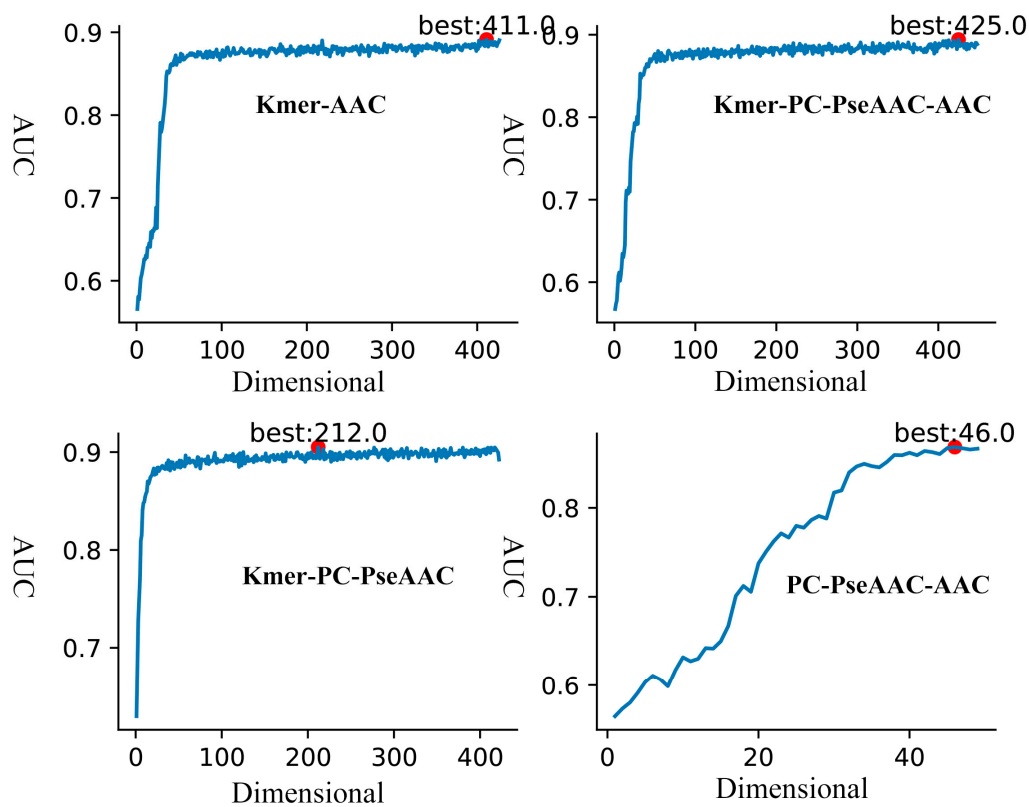

Figure S2: The most discriminative dimensional features number using XGBoost algorithm.

**Table S1.** The hyperparameters of SVM predictive model.

| Methods                    | Kernel | Gamma | Cost |
|----------------------------|--------|-------|------|
| SVM-ACC                    | rbf    | 100   | 100  |
| SVM-Kmer                   | rbf    | 100   | 100  |
| SVM-PC-PseAAC              | rbf    | 1     | 1000 |
| SVM-Kmer-ACC               | rbf    | 100   | 1    |
| SVM-Kmer-PC-PseAAC         | rbf    | 1     | 100  |
| SVM-ACC-PC-PseAAC          | rbf    | 1000  | 1    |
| SVM-ACC-Kmer-PC-PseAAC     | rbf    | 100   | 1    |
| SVM-PCA-Kmer-ACC           | rbf    | 1     | 100  |
| SVM-PCA-Kmer-PC-PseAAC     | rbf    | 1     | 1000 |
| SVM-PCA-ACC-PC-PseAAC      | rbf    | 1     | 1000 |
| SVM-PCA-ACC-Kmer-PC-PseAAC | rbf    | 1     | 1000 |

**Table S2.** The hyperparameters of XGBoost predictive model.

| Methods                            | Max_depth | Min_child_weig<br>ht | Gamma | Subsample | Colsample_bytr<br>ee | Learning_ra<br>te |
|------------------------------------|-----------|----------------------|-------|-----------|----------------------|-------------------|
| XGBoost-ACC                        | 31        | 1                    | 0     | 0.9       | 0.9                  | 0.05              |
| XGBoost-Kmer                       | 14        | 6                    | 0     | 0.8       | 0.8                  | 0.1               |
| XGBoost-PC-PseAAC                  | 11        | 1                    | 0     | 0.8       | 0.8                  | 0.1               |
| XGBoost-Kmer-ACC                   | 11        | 1                    | 0     | 0.8       | 0.8                  | 0.1               |
| XGBoost-Kmer-PC-PseAAC             | 11        | 1                    | 0     | 1         | 0.3                  | 0.1               |
| XGBoost-ACC-PC-PseAAC              | 15        | 1                    | 0     | 0.8       | 0.8                  | 0.1               |
| XGBoost-ACC-Kmer-PC-<br>PseAAC     | 13        | 6                    | 0     | 0.8       | 0.8                  | 0.1               |
| XGBoost-PCA-Kmer-ACC               | 15        | 9                    | 0.3   | 0.9       | 0.8                  | 0.1               |
| XGBoost-PCA-Kmer-PC-<br>PseAAC     | 19        | 3                    | 0.3   | 0.9       | 0.8                  | 0.1               |
| XGBoost-PCA-ACC-PC-<br>PseAAC      | 19        | 3                    | 0.1   | 0.8       | 0.9                  | 0.1               |
| XGBoost-PCA-ACC-Kmer-PC-<br>PseAAC | 23        | 3                    | 0.1   | 0.9       | 0.8                  | 0.1               |

**Table S3.** The SAGs data of 83 examined species.

| Species                    | Protein Number | SAGs   | Percentage  | Classification     | Type              |
|----------------------------|----------------|--------|-------------|--------------------|-------------------|
| Actinidia chinensis        | 32,876         | 18,099 | 0.550523178 | Dicots             | Fruit trees       |
| Amaranthus hypochondriacus | 23,878         | 9825   | 0.411466622 | Dicots             | Ornamental plants |
| Amborella trichopoda       | 27,302         | 10,781 | 0.394879496 | Other higher plant |                   |
| Ananas comosus             | 26,656         | 12,303 | 0.461547119 | Monocots           | Fruit trees       |
| Aquilegia coerulea         | 43,545         | 18,803 | 0.431806178 | Dicots             | Ornamental plants |
| Arabidopsis halleri        | 26,883         | 14,073 | 0.523490682 | Dicots             |                   |
| Arabidopsis thaliana       | 35,381         | 20,283 | 0.573273791 | Dicots             |                   |
| Asparagus officinalis      | 23,120         | 9637   | 0.41682526  | Monocots           | Vegetables        |
| Barbarea vulgaris          | 25,092         | 13,743 | 0.547704448 | Dicots             |                   |
| Beta vulgaris              | 32,805         | 15,321 | 0.467032465 | Dicots             | Vegetables        |
| Boechera stricta           | 29,800         | 16,438 | 0.551610738 | Dicots             |                   |
| Brachypodium distachyon    | 52,972         | 22,500 | 0.4247527   | Monocots           |                   |
| Brachypodium stacei        | 35,795         | 15,613 | 0.436178237 | Monocots           |                   |
| Brassica juncea            | 76,349         | 41,774 | 0.547145346 | Dicots             | Vegetables        |
| Brassica napus             | 100,995        | 50,468 | 0.499707906 | Dicots             |                   |
| Brassica nigra             | 47,925         | 25,806 | 0.538466354 | Dicots             |                   |
| Brassica oleracea          | 35,315         | 18,446 | 0.522327623 | Dicots             | Vegetables        |
| Brassica rapa              | 48,158         | 25,776 | 0.535238174 | Dicots             | Vegetables        |
| Capsella grandiflora       | 26,558         | 15,309 | 0.576436479 | Dicots             | Ornamental plants |
| Capsella rubella           | 33,542         | 19,861 | 0.592123308 | Dicots             |                   |
| Capsicum annuum            | 34,587         | 14,538 | 0.420331338 | Dicots             | Vegetables        |
| Chara braunii              | 30,710         | 7034   | 0.229045913 | Lower plant        |                   |
| Chenopodium quinoa         | 34,424         | 16,390 | 0.476121311 | Dicots             |                   |
| Chlamydomonas reinhardtii  | 19,516         | 1161   | 0.05948965  | Lower plant        |                   |
| Chlorella variabilis       | 9776           | 538    | 0.055032733 | Lower plant        |                   |
| Chondrus crispus           | 9622           | 1681   | 0.174703804 | Lower plant        |                   |
| Chrysanthemum nankingense  | 56,870         | 24,262 | 0.426622121 | Monocots           | Ornamental plants |
| Cicer arietinum            | 28,022         | 11,310 | 0.403611448 | Dicots             | Vegetables        |
| Citrullus lanatus          | 22,596         | 11,624 | 0.514427332 | Dicots             | Vegetables        |
| Citrus grandis             | 42,880         | 19,257 | 0.449090485 | Dicots             | Fruit trees       |
| Coccomyxa subellipsoidea   | 9629           | 934    | 0.09699865  | Lower plant        |                   |
| Coffea canephora           | 25,571         | 12,461 | 0.487309843 | Dicots             | Fruit trees       |
| Corchorus capsularis       | 29,353         | 10,986 | 0.374271795 | Dicots             |                   |
| Cucumis melo               | 28,299         | 12,081 | 0.426905544 | Dicots             | Vegetables        |
| Cucumis sativus            | 23,581         | 11,750 | 0.498282516 | Dicots             | Vegetables        |
| Cucurbita maxima           | 31,962         | 17,229 | 0.539046368 | Dicots             | Vegetables        |
| Cyanidioschyzon merolae    | 4972           | 283    | 0.056918745 | Lower plant        |                   |

|                                       |         |        |             |                       |                       |
|---------------------------------------|---------|--------|-------------|-----------------------|-----------------------|
| <i>Cynara cardunculus</i>             | 25,079  | 13,426 | 0.535348299 | Dicots                | Ornament<br>al plants |
| <i>Daucus carota</i>                  | 31,861  | 13,864 | 0.43514014  | Dicots                | Vegetables            |
| <i>Dioscorea cayenensis</i>           | 64,830  | 23,992 | 0.370075582 | Monocots              |                       |
| <i>Dunaliella salina</i>              | 18,173  | 1703   | 0.09371045  | Lower plant           |                       |
| <i>Eragrostis curvula</i>             | 55,173  | 23,185 | 0.42022366  | Monocots              |                       |
| <i>Eragrostis tef</i>                 | 40,685  | 16,197 | 0.398107411 | Dicots                |                       |
| <i>Eutrema salsugineum</i>            | 29,280  | 16,652 | 0.568715847 | Dicots                |                       |
| <i>Galdieria sulphuraria</i>          | 7013    | 1889   | 0.269356909 | Lower plant           |                       |
| <i>Glycine max</i>                    | 88,406  | 41,391 | 0.468192204 | Dicots                |                       |
| <i>Helianthus annuus</i>              | 52,183  | 21,428 | 0.410631815 | Dicots                | Ornament<br>al plants |
| <i>Hordeum vulgare</i>                | 225,723 | 83,270 | 0.368903479 | Monocots              |                       |
| <i>Ipomoea nil</i>                    | 41,880  | 18,582 | 0.443696275 | Dicots                | Ornament<br>al plants |
| <i>Ipomoea triloba</i>                | 46,904  | 24,950 | 0.531937575 | Dicots                |                       |
| <i>Juglans regia</i>                  | 41,077  | 21,780 | 0.530223726 | Dicots                | Fruit trees           |
| <i>Kalanchoe fedtschenkoi</i>         | 45,044  | 21,776 | 0.483438416 | Dicots                | Ornament<br>al plants |
| <i>Lactuca sativa</i>                 | 54,434  | 19,258 | 0.353786237 | Dicots                | Vegetables            |
| <i>Leersia perrieri</i>               | 38,823  | 18,673 | 0.480977771 | Monocots              | Medicinal<br>plants   |
| <i>Lupinus angustifolius</i>          | 33,073  | 15,715 | 0.475161007 | Dicots                | Ornament<br>al plants |
| <i>Malus domestica</i>                | 40,613  | 19,995 | 0.492330042 | Dicots                | Fruit trees           |
| <i>Manihot esculenta</i>              | 41,393  | 19,612 | 0.473799918 | Dicots                |                       |
| <i>Marchantia polymorpha</i>          | 24,664  | 7777   | 0.315317872 | Other higher<br>plant | Medicinal<br>plants   |
| <i>Medicago truncatula</i>            | 14,158  | 7441   | 0.525568583 | Dicots                |                       |
| <i>Micromonas pusilla</i><br>CCMP1545 | 10,634  | 1704   | 0.160240737 | Lower plant           |                       |
| <i>Micromonas pusilla</i><br>RCC299   | 10,103  | 1423   | 0.140849253 | Lower plant           |                       |
| <i>Musa acuminata</i>                 | 45,586  | 23,696 | 0.519808713 | Monocots              | Fruit trees           |
| <i>Musa nana</i> Lour.                | 43,041  | 15,428 | 0.358448921 | Monocots              | Fruit trees           |
| <i>Quercus robur</i>                  | 25,631  | 11,940 | 0.465842144 | Dicots                |                       |
| <i>Oryza sativa</i> L.                | 66,326  | 23,640 | 0.356421313 | Monocots              |                       |
| <i>Ostreococcus</i><br>lucimarinus    | 7769    | 983    | 0.126528511 | Lower plant           |                       |
| <i>Panax ginseng</i>                  | 59,117  | 25,953 | 0.439010775 | Dicots                | Medicinal<br>plants   |
| <i>Panicum hallii</i>                 | 43,148  | 16,069 | 0.372415871 | Monocots              |                       |
| <i>Phalaenopsis equestris</i>         | 29,093  | 15,891 | 0.546213866 | Monocots              | Ornament<br>al plants |
| <i>Phoenix dactylifera</i>            | 48,266  | 25,700 | 0.532465918 | Monocots              | Fruit trees           |
| <i>Physcomitrella patens</i>          | 47,945  | 18,930 | 0.394827406 | Other higher<br>plant |                       |
| <i>Raphanus raphanistrum</i>          | 38,102  | 21,270 | 0.558238413 | Dicots                | Vegetables            |
| <i>Rosa chinensis</i>                 | 47,791  | 25,075 | 0.524680379 | Dicots                | Ornament<br>al plants |
| <i>Schrenkiella parvula</i>           | 26,747  | 14,701 | 0.549631734 | Dicots                |                       |

|                     |        |        |             |                       |                       |
|---------------------|--------|--------|-------------|-----------------------|-----------------------|
| Setaria italica     | 42,996 | 17,514 | 0.407340218 | Monocots              |                       |
| Setaria viridis     | 38,334 | 13,612 | 0.355089477 | Monocots              |                       |
| Sphagnum fallax     | 45,611 | 16,081 | 0.352568459 | Other higher<br>plant |                       |
| Spirodela polyrhiza | 19,482 | 8682   | 0.445642131 | Monocots              | Medicinal<br>plants   |
| Theobroma cacao     | 44,302 | 21,502 | 0.485350549 | Dicots                | Ornament<br>al plants |
| Trifolium pratense  | 35,206 | 11,729 | 0.33315344  | Dicots                | Ornament<br>al plants |
| Vigna angularis     | 31,241 | 13,265 | 0.424602285 | Dicots                |                       |
| Vitis vinifera      | 55,415 | 27,043 | 0.488008662 | Dicots                | Fruit trees           |
| Volvox carteri      | 16,074 | 5100   | 0.317282568 | Lower plant           |                       |
